# Supplementary material for: CyTOF analysis identifies unusual immune cells in urine of BCG-treated bladder cancer patients
Source: PubMed Central journal article supplement (PMC9520259; doi:10.3389/fimmu.2022.970931), 2022-09-15
Supplement: DataSheet_1.pdf [file DataSheet_1.pdf]

**Supplementary Table 1. Cell count in urine**

| Patient | Week                      | Days after instillation | x10 <sup>3</sup> cells/ml |
|---------|---------------------------|-------------------------|---------------------------|
| P25     | Before first instillation |                         | 9                         |
|         | w1                        | d2                      | 64                        |
|         |                           | d5                      | 90                        |
|         |                           | d7                      | 33                        |
|         | w2                        | d7                      | 95                        |
|         | w3                        | d7                      | 75                        |
|         | w5                        | d7                      | 1200                      |
|         | w6                        | d5                      | 720                       |
|         |                           | d7                      | 2619                      |
|         | w19                       | d2                      | 75                        |
|         |                           | d5                      | 53                        |
| d7      |                           | 22                      |                           |
| P26     | Before first instillation |                         | 40                        |
|         | w1                        | d5                      | 159                       |
|         |                           | d7                      | 94                        |
|         | w2                        | d7                      | 80                        |
|         | w3                        | d2                      | 100                       |
|         |                           | d7                      | 30                        |
|         | w6                        | d5                      | 18                        |
|         |                           | d7                      | 9                         |
|         | w7                        | d2                      | 64                        |
|         | w18                       | d7                      | 4                         |
| P27     | Before first instillation |                         | 0                         |
|         | w2                        | d7                      | 10                        |
|         | w5                        | d7                      | 43                        |
| P28     | Before first instillation |                         | 0                         |
|         | w2                        | d7                      | 60                        |
|         | w5                        | d7                      | 188                       |
| P29     | Before first instillation |                         | 0                         |
|         | w2                        | d7                      | 9                         |
| P30     | Before first instillation |                         | 0                         |
|         | w2                        | d7                      | 10                        |
|         | w3                        | d2                      | 248                       |
|         |                           | d7                      | 94                        |
|         | w6                        | d2                      | 200                       |
| d7      |                           | 9                       |                           |
| P31     | Before first instillation |                         | 4800                      |
|         | w1                        | d2                      | 1660                      |
|         |                           | d7                      | 1510                      |
|         | w2                        | d7                      | 720                       |
|         | w3                        | d2                      | 1089                      |
| d7      |                           | 750                     |                           |
| P41     | w5                        | d7                      | 4                         |
| P42     | w2                        | d7                      | 12                        |
| P44     | w5                        | d7                      | 12                        |
| P45     | w5                        | d7                      | 12                        |
| P46     | w2                        | d7                      | 12                        |
| P47     | w5                        | d7                      | 60                        |

**Supplementary Table 2. CyTOF antibody panel**

| <b>Isotope</b> | <b>Ab</b>      | <b>Clone</b> | <b>Company</b>    |
|----------------|----------------|--------------|-------------------|
| Qdot - Cd      | HLA-DR         | Tu36         | Life technologies |
| 89Y            | EpCAM          | 9C4          | Biolegend         |
| 115In          | CD19           | HIB19        | Biolegend         |
| 141Pr          | CD38           | HIT2         | BioLegend         |
| 142Nd          | CD11b          | ICRF44       | Biolegend         |
| 143Nd          | CD4            | OKT4         | Biolegend         |
| 144Nd          | CD8            | SK1          | Biolegend         |
| 145Nd          | CD57           | HCD57        | Biolegend         |
| 146Nd          | PD-1           | EH12.2H7     | Biolegend         |
| 147Sm          | CD3            | UCHT1        | Biolegend         |
| 148Nd          | CD35           | E11          | Biolegend         |
| 149Sm          | TLR2           | TL2.1        | Biolegend         |
| 150Nd          | CD45           | HI30         | Biolegend         |
| 151Eu          | CD15           | HI98         | Biolegend         |
| 152Sm          | CD63           | H5C6         | Biolegend         |
| 153Eu          | CD11c          | Bu15         | Biolegend         |
| 154Sm          | CD14           | M5E2         | Biolegend         |
| 155Gd          | NKp46          | 9E2          | Biolegend         |
| 156Gd          | TCRgd          | B1           | Biolegend         |
| 157Gd          | NKG2C          | 134522       | R&D System        |
| 158Gd          | CD24           | ML5          | Biolegend         |
| 159Tb          | CD7            | CD7-6B7      | Biolegend         |
| 160Gd          | CD69           | FN50         | Biolegend         |
| 161Dy          | CD66b          | G10F5        | Biolegend         |
| 162Dy          | CD64 (FcgrI)   | 10,1         | Biolegend         |
| 163Dy          | Invariant NKT  | 6B11         | Biolegend         |
| 164Dy          | CD89           | A59          | Biolegend         |
| 165Ho          | CD107a         | H4A3         | Biolegend         |
| 166Er          | TLR4           | HTA125       | Biolegend         |
| 167Er          | CD94           | DX22         | Biolegend         |
| 168Er          | MICA           | MAB13001     | R&D System        |
| 169Tm          | CD32 (FcgrIIa) | FUN-2        | Biolegend         |
| 170Yb          | CD107b         | H4B4         | Biolegend         |
| 171Yb          | NKG2A          | 131411       | R&D systems       |
| 172Yb          | CD25           | M-A251       | Biolegend         |
| 173Yb          | CD95           | DX2          | Biolegend         |
| 174Yb          | CD56           | NCAM16.2     | BD                |
| 175Lu          | CD33           | WM53         | Biolegend         |
| 176Yb          | HLA-DQ         | Tu169        | Biolegend         |
| 209Bi          | CD16 (FcgrIII) | 3G8          | Fluidigm          |

## A. DNA labeling

## Unstained

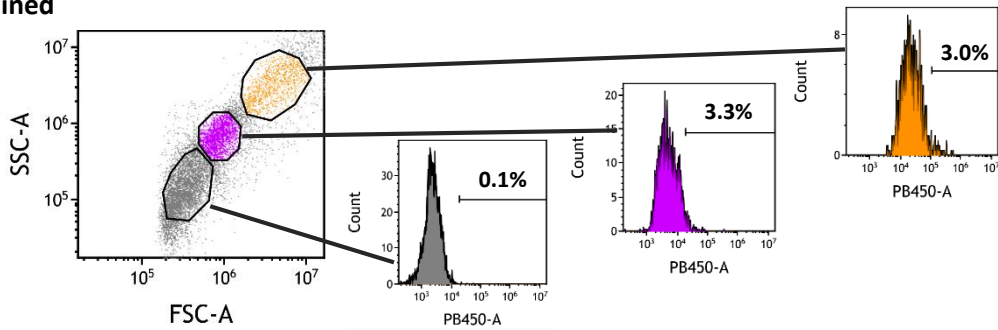

## Hoechst

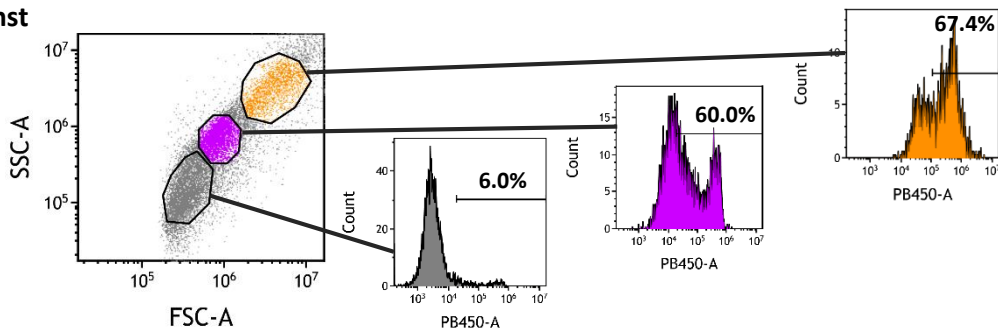

## B. Blocking experiments

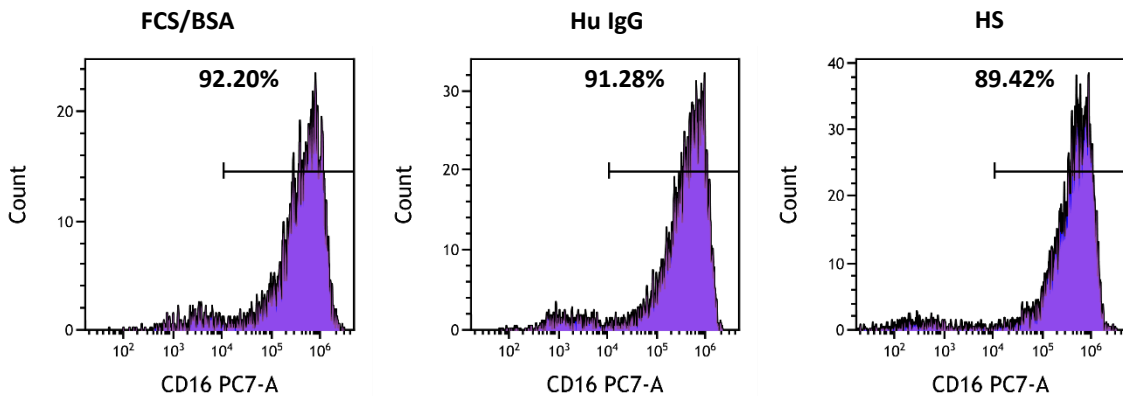

**Supplementary Figure 1. Flow cytometry analysis of urine cells. A. Flow cytometry gating strategy and DNA labeling.** Doublets were excluded in the  $FSC_{height}/FSC_{area}$  plots. Hoechst staining was analysed within three different gates in FCS/SSC as depicted. Upper panels correspond to unstained samples and lower panels to samples stained with 1/100 Hoechst 33342 dye. The percentage of Hoechst positive cells is shown for each histogram; the position of the marker was maintained in each region. The grey region corresponds to DNA-negative events. **B. Blocking experiments.** Different conditions for blocking of Fc receptors were tried: PBA [PBS supplemented with 0.5% bovine serum albumin (BSA), 1% FBS and 0.1% sodium azide], 10 mg/ml of purified human IgG and 10% human serum (HS). Cells were stained with antibodies against CD14 and CD16. The figure represents histograms of the CD16 staining within the CD14 positive cells. All the blocking conditions have similar staining pattern.

**Mass cytometry data normalization**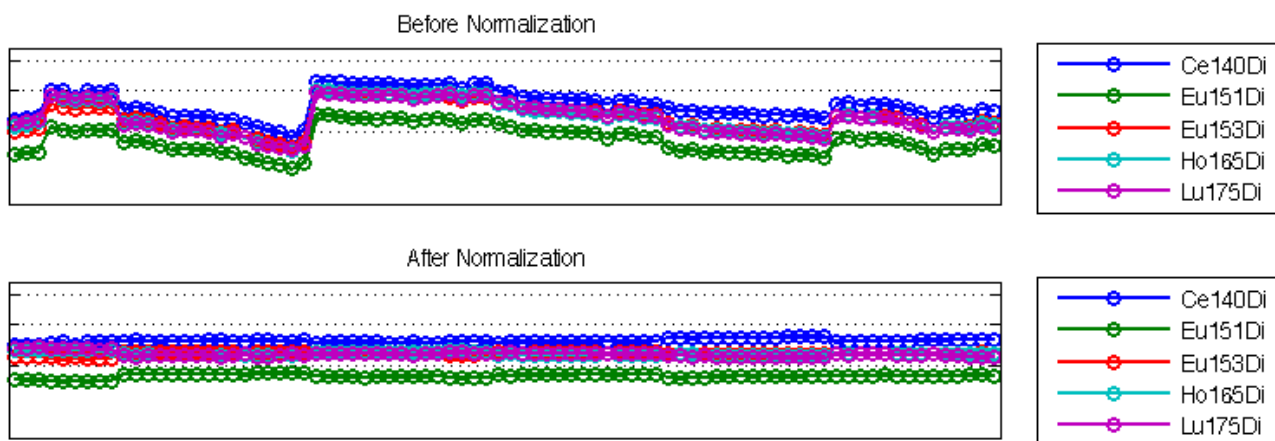

**Supplementary Figure 2. Mass cytometry data normalization.** Data collected in all CyTOF experiments were run through Normaliser v0.3.

**A. VisNE analysis CyTOF**

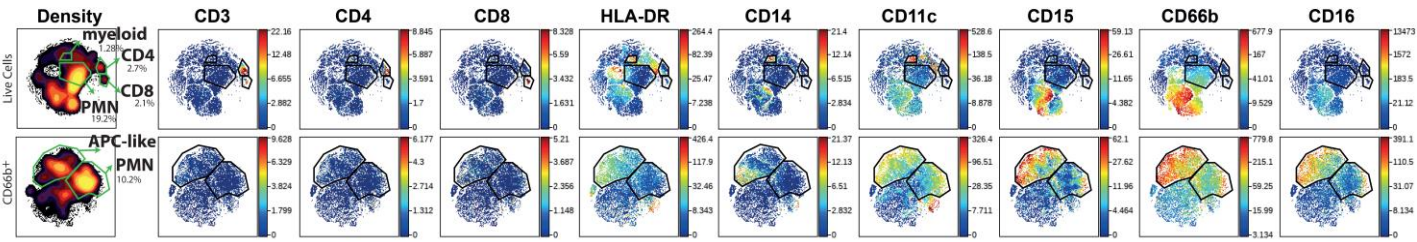

**B. Manual analysis CyTOF within lymphocytes region**

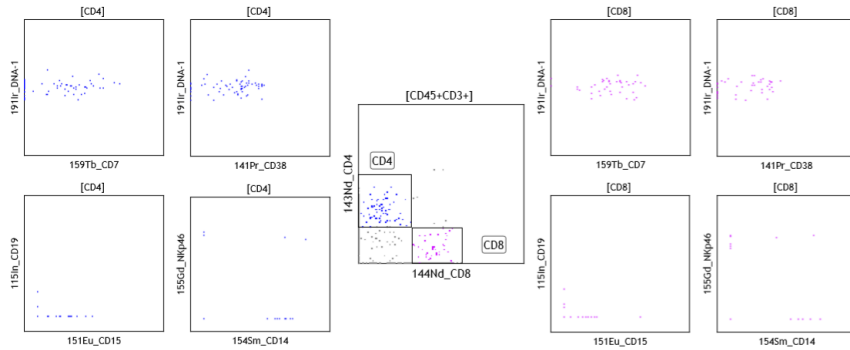

**C. New flow cytometry**

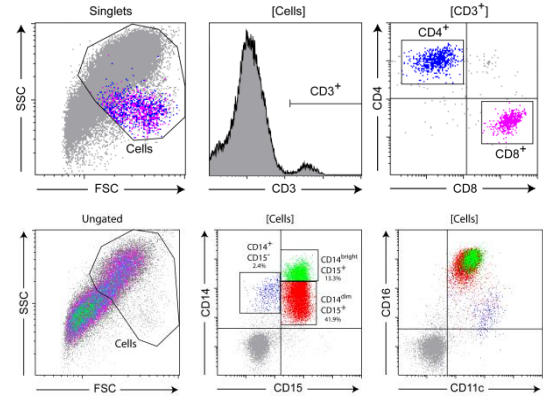

**Supplementary Figure 3. Leukocytes released to urine analysed by CyTOF and flow cytometry. A. visNE analysis.** CD3<sup>+</sup> cells could be visualised in visNE analyses and these lymphocytes could be classified as CD4 or CD8. Similarly, CD66b cells, also positive for CD15, were identified. **B. Manual analysis of CyTOF data.** CyTOF data were analysed using flow cytometry software to identify CD3 positive cells, CD4<sup>+</sup> and CD8<sup>+</sup>. **C. Flow cytometry.** Cells from the same patient were analysed by flow cytometry to confirm the presence of CD3 lymphocytes. A population of CD15<sup>+</sup>CD14<sup>+</sup>CD16<sup>+</sup> cells was confirmed.

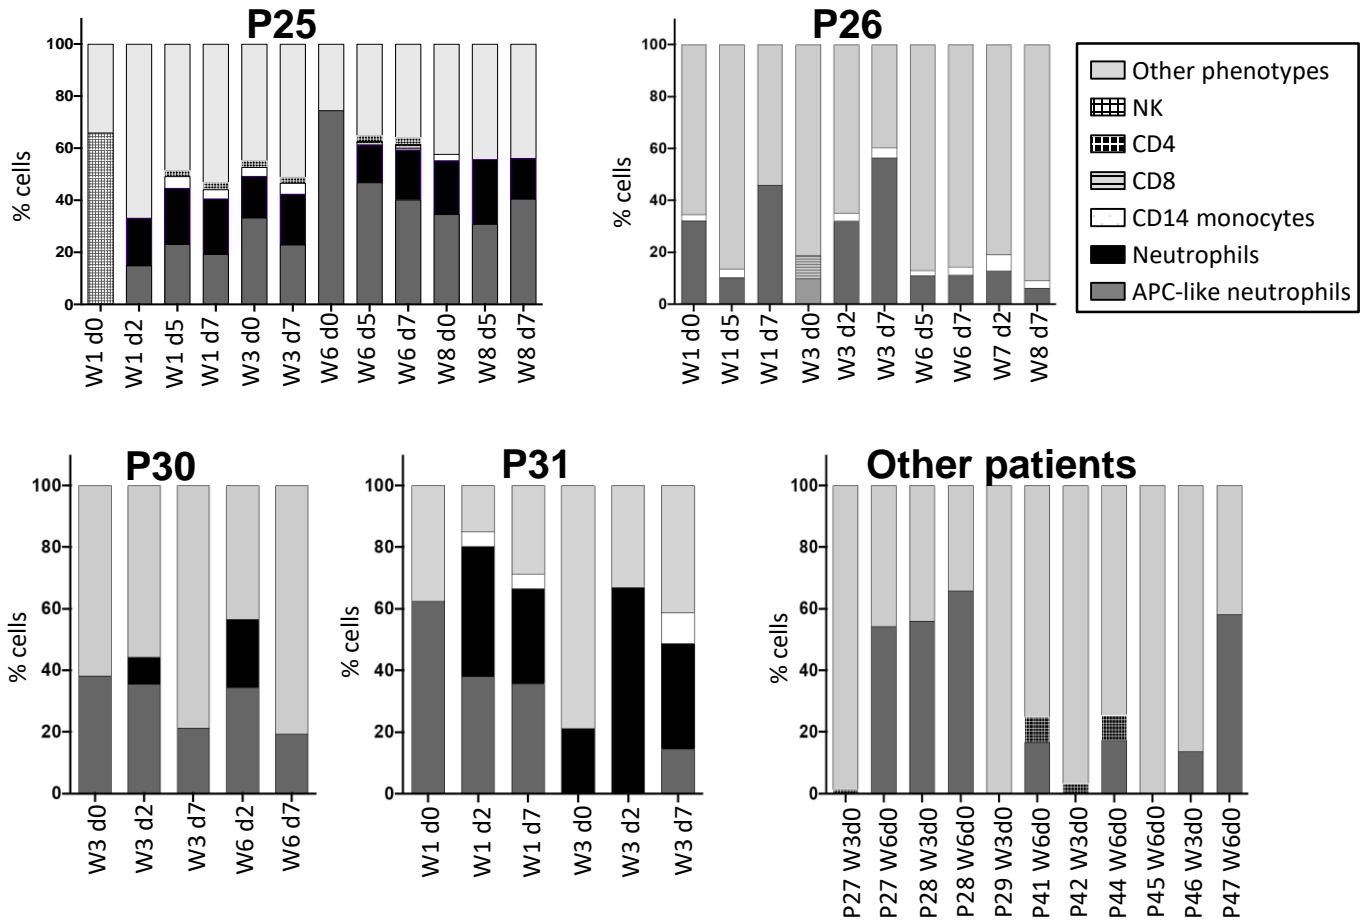

**Supplementary Figure 4. Immune populations in different patients.** Graphs represent the number of cell populations found in each patient in viSNE analysis of data obtained in CyTOF.
